# Supplementary material
Source: PubMed Central journal article supplement (PMC7322963)
Supplement: advancesADV2020001851C-suppl1.pdf [file advancesADV2020001851C-suppl1.pdf]

# Supplement 1: Membership of the Guideline Panel and the Systematic Review Team

## ASH Guideline Panel on Sickle Cell Disease–Related Pain

| Name                            | Role, Area of Expertise                   |
|---------------------------------|-------------------------------------------|
| Amanda Brandow, DO, MS          | Co-chair, Pediatric Hematology            |
| Eddy Lang, MD                   | Co-chair, Methodology, Emergency Medicine |
| C. Patrick Carroll, MD          | Psychiatry                                |
| Susan Creary, MD                | Pediatric Hematology                      |
| Jeffrey Glassberg, MD, MS       |                                           |
| Ronisha Edwards-Elliott, BA     | Patient Representative                    |
| Robert W. Hurley, MD, PhD       | Anesthesiology                            |
| Abdullah Kutlar, MD             |                                           |
| Kathleen Neville, MD, MBA, MS * | Pediatric Hematology                      |
| Jennifer Stinson, PhD, RN, CPNP | Nursing                                   |
| John J. Strouse, MD, PhD        | Pediatric and Adult Hematology            |
| Diana Wilkie, PhD, RN **        | Nursing, Palliative Care, Pain Assessment |
| Fouza Yusuf, MS, MPH            | Patient Representative                    |
| William Zempsky, MD, MPH        | Pain Medicine                             |

\* Stopped participating on February 16, 2018.

\*\* Stopped participating on June 22, 2018.

## Researchers From the Mayo Evidence-Based Practice Center Who Contributed to Evidence Syntheses

| Name                        | Role                   |
|-----------------------------|------------------------|
| M. Hassan Murad             | Principal Investigator |
| Patricia Barrionuevo Moreno | Research Fellow        |
| Jingyi Ding                 | Research Fellow        |
| Magdoleen Farah             | Research Fellow        |
| Bashar Hasan                | Research Fellow        |

| <b>Name</b>   | <b>Role</b>     |
|---------------|-----------------|
| Larry Prokop  | Librarian       |
| Mohamed Seisa | Research Fellow |
| Nayfeh Tarek  | Research Fellow |
