# Supplementary material
Source: PubMed Central journal article supplement (PMC7322963)
Supplement: advancesADV2020001851C-suppl4.pdf [file advancesADV2020001851C-suppl4.pdf]

# American Society of Hematology Guidelines for Sickle Cell Disease: Management of Acute and Chronic Pain

## Supplement 4: Search Strategies

### Questions 1,2,3,5,7,8

Database(s): **Embase** 1988 to 2017 Week 33, Ovid MEDLINE(R) 1946 to Present and Epub Ahead of Print, In-Process & Other Non-Indexed Citations and Ovid MEDLINE(R) Daily

Search Strategy:

| # | Searches                                                                                                                                                                                                                                                                                                                                                                                                                                                                                                                                                                                                                                                                                                                                                                                                                                                                                                                                         | Results |
|---|--------------------------------------------------------------------------------------------------------------------------------------------------------------------------------------------------------------------------------------------------------------------------------------------------------------------------------------------------------------------------------------------------------------------------------------------------------------------------------------------------------------------------------------------------------------------------------------------------------------------------------------------------------------------------------------------------------------------------------------------------------------------------------------------------------------------------------------------------------------------------------------------------------------------------------------------------|---------|
| 1 | sickle cell anemia.mp. or exp Anemia, Sickle Cell/                                                                                                                                                                                                                                                                                                                                                                                                                                                                                                                                                                                                                                                                                                                                                                                                                                                                                               | 49714   |
| 2 | ((((drepanocytic or "haemoglobin s" or "hemoglobin s" or "Hb SS" or hbs or sickle or "sickle cell" or sickling or ss) adj2 (anaemia* or anemia* or disease* or disorder*)) or drepanocytemia* or drepanocytoses or drepanocytosis or "haemoglobin SS" or "hemoglobin SS" or meniscocytoses or meniscocytosis).ti,ab,hw,kw.                                                                                                                                                                                                                                                                                                                                                                                                                                                                                                                                                                                                                       | 52742   |
| 3 | 1 or 2                                                                                                                                                                                                                                                                                                                                                                                                                                                                                                                                                                                                                                                                                                                                                                                                                                                                                                                                           | 55239   |
| 4 | exp pain/dt                                                                                                                                                                                                                                                                                                                                                                                                                                                                                                                                                                                                                                                                                                                                                                                                                                                                                                                                      | 219224  |
| 5 | exp Chronic Pain/dt or exp Headache/dt or exp Headache Disorders/dt or exp Back Pain/dt or exp Neuralgia/dt or exp Nociceptive Pain/dt or exp Osteonecrosis/dt or exp Migraine Disorders/dt or exp Osteomyelitis/dt or exp exp Low Back Pain/dt or exp Neck Pain/dt or exp Acute Pain/dt or exp abdominal pain/dt or exp knee pain/dt or exp upper abdominal pain/dt or exp lower abdominal pain/dt or exp perineal pain/dt or exp inguinal pain/dt or exp face pain/dt or exp pelvic pain/dt or exp shoulder pain/dt or exp flank pain/dt or exp limb pain/dt or exp noncardiac chest pain/dt or exp spinal pain/dt or exp epigastric pain/dt or exp ankle pain/dt or exp thorax pain/dt or exp patellofemoral pain syndrome/dt or exp leg pain/dt or exp eye pain/dt or exp skin pain/dt or exp arm pain/dt or exp hip pain/dt or exp biliary tract pain/dt or exp stomach pain/dt or exp hand pain/dt or exp heel pain/dt or exp bone pain/dt | 185423  |
| 6 | ("Alice in Wonderland Syndrome*" or "atypical neuralgia*" or "atypical neuralgias" or "back ache*" or "back pain*" or backache* or backpain* or cephalalgia* or cephalea* or cephalgia* or cephalodynia* or "cerebral pain*" or "chronic intractable pain*" or "chronic pain*" or "cranial pain*" or cranialgia* or "discogenic pain*" or "diskogenic pain*" or dorsalgia* or "head ache*" or "head pain*" or headache or headache* or hemicrania* or "inflammatory pain*" or "ischemic pain*" or lumbago or migraine* or                                                                                                                                                                                                                                                                                                                                                                                                                        | 655249  |

|    |                                                                                                                                                                                                                                                                                                                                                                                                                                                                                                                                                                                                                                                                                                                                                                                                                                                                                                                                                                                                                                                                                                                                                                                                                                                                                                                                                                                                                                                         |         |
|----|---------------------------------------------------------------------------------------------------------------------------------------------------------------------------------------------------------------------------------------------------------------------------------------------------------------------------------------------------------------------------------------------------------------------------------------------------------------------------------------------------------------------------------------------------------------------------------------------------------------------------------------------------------------------------------------------------------------------------------------------------------------------------------------------------------------------------------------------------------------------------------------------------------------------------------------------------------------------------------------------------------------------------------------------------------------------------------------------------------------------------------------------------------------------------------------------------------------------------------------------------------------------------------------------------------------------------------------------------------------------------------------------------------------------------------------------------------|---------|
|    | migrainous or "Morton Neuroma*" or "nerve pain*" or neuralgia* or neurodynia* or "neuropathic pain*" or "nociceptive pain*" or "noncrisis pain*" or "non-crisis pain*" or "paroxysmal nerve pain*" or "Piriformis Muscle Syndrome*" or Sciatica* or "somatic pain*" or "status hemicranicus" or "stump neuralgia*" or "sunct syndrome" or "tissue pain*" or "vertebrogenic pain syndrome*" or "Visceral Pain*" or "widespread pain*").ti,ab,hw,kw.                                                                                                                                                                                                                                                                                                                                                                                                                                                                                                                                                                                                                                                                                                                                                                                                                                                                                                                                                                                                      |         |
| 7  | ("avascular necros*" or "avascular bone necros*" or "bone necros*" or (necros* adj3 bone) or "avascular bone" or "hip necros*" or "avascular hip*" or " avascular osteonecros*" or osteonecros* or (kienbock* adj1 disease) or (kienboeck* adj1 disease) or " leg ulcer*" or ((leg or "varicose leg") adj3 (ulcer* or ulcus)) or "crural ulcer*" or "cruris ulcer*" or "leg chronic ulcer*" or "leg ulcus" or "ulcer cruris" or "ulcus acurris" or "ulcus cruris varicosum" or "bone infarct*" or ulcer* or "tissue infarct*").ti,ab,hw,kw.                                                                                                                                                                                                                                                                                                                                                                                                                                                                                                                                                                                                                                                                                                                                                                                                                                                                                                             | 549945  |
| 8  | ("sickle cell crisis" or "sickle-cell crisis" or "pain crisis" or (("vaso-occlusive" or "vaso occlusive" or vasoocclusive) adj2 (crisis or ache or pain* or event*)) or ((hip or rib* or sternal or abdom* or hepatic* or liver or kidney* or renal* or papilla*) adj2 (necros* or infarct* or sequest* or pain* or crisis or ache)) or "acute synovitis" or AVN or dactylitis or (extremity adj2 (pain* or ache)) or (bone adj2 (pain* or ache))).ti,ab,hw,kw.                                                                                                                                                                                                                                                                                                                                                                                                                                                                                                                                                                                                                                                                                                                                                                                                                                                                                                                                                                                         | 303079  |
| 9  | 4 and (6 or 7 or 8)                                                                                                                                                                                                                                                                                                                                                                                                                                                                                                                                                                                                                                                                                                                                                                                                                                                                                                                                                                                                                                                                                                                                                                                                                                                                                                                                                                                                                                     | 99355   |
| 10 | 3 and (4 or 5 or 9)                                                                                                                                                                                                                                                                                                                                                                                                                                                                                                                                                                                                                                                                                                                                                                                                                                                                                                                                                                                                                                                                                                                                                                                                                                                                                                                                                                                                                                     | 1444    |
| 11 | (exp animals/ or exp nonhuman/) not exp humans/                                                                                                                                                                                                                                                                                                                                                                                                                                                                                                                                                                                                                                                                                                                                                                                                                                                                                                                                                                                                                                                                                                                                                                                                                                                                                                                                                                                                         | 9251482 |
| 12 | ((alpaca or alpacas or amphibian or amphibians or animal or animals or antelope or armadillo or armadillos or avian or baboon or baboons or beagle or beagles or bee or bees or bird or birds or bison or bovine or buffalo or buffaloes or buffalos or "c elegans" or "Caenorhabditis elegans" or camel or camels or canine or canines or carp or cats or cattle or chick or chicken or chickens or chicks or chimp or chimpanze or chimpanzees or chimps or cow or cows or "D melanogaster" or "dairy calf" or "dairy calves" or deer or dog or dogs or donkey or donkeys or drosophila or "Drosophila melanogaster" or duck or duckling or ducklings or ducks or equid or equids or equine or equines or feline or felines or ferret or ferrets or finch or finches or fish or flatworm or flatworms or fox or foxes or frog or frogs or "fruit flies" or "fruit fly" or "G mellonella" or "Galleria mellonella" or geese or gerbil or gerbils or goat or goats or goose or gorilla or gorillas or hamster or hamsters or hare or hares or heifer or heifers or horse or horses or insect or insects or jellyfish or kangaroo or kangaroos or kitten or kittens or lagomorph or lagomorphs or lamb or lambs or llama or llamas or macaque or macaques or macaw or macaws or marmoset or marmosets or mice or minipig or minipigs or mink or minks or monkey or monkeys or mouse or mule or mules or nematode or nematodes or octopus or octopuses or | 7957083 |

|    |                                                                                                                                                                                                                                                                                                                                                                                                                                                                                                                                                                                                                                                                                                                                                                                                                                                                                 |         |
|----|---------------------------------------------------------------------------------------------------------------------------------------------------------------------------------------------------------------------------------------------------------------------------------------------------------------------------------------------------------------------------------------------------------------------------------------------------------------------------------------------------------------------------------------------------------------------------------------------------------------------------------------------------------------------------------------------------------------------------------------------------------------------------------------------------------------------------------------------------------------------------------|---------|
|    | orangutan or "orang-utan" or orangutans or "orang-utans" or oxen or parrot or parrots or pig or pigeon or pigeons or piglet or piglets or pigs or porcine or primate or primates or quail or rabbit or rabbits or rat or rats or reptile or reptiles or rodent or rodents or ruminant or ruminants or salmon or sheep or shrimp or slug or slugs or swine or tamarin or tamarins or toad or toads or trout or urchin or urchins or vole or voles or waxworm or waxworms or worm or worms or xenopus or "zebra fish" or zebrafish) not (human or humans or patient or patients)).ti,ab,hw,kw.                                                                                                                                                                                                                                                                                    |         |
| 13 | time factors.mp.                                                                                                                                                                                                                                                                                                                                                                                                                                                                                                                                                                                                                                                                                                                                                                                                                                                                | 1183373 |
| 14 | time.ti,ab,hw,kw.                                                                                                                                                                                                                                                                                                                                                                                                                                                                                                                                                                                                                                                                                                                                                                                                                                                               | 7366989 |
| 15 | time.mp.                                                                                                                                                                                                                                                                                                                                                                                                                                                                                                                                                                                                                                                                                                                                                                                                                                                                        | 7371644 |
| 16 | ("self-management intervention*" or "coping skill*" or "non-pharmacological therap*" or "cognitiive behavioral therap*" or "acceptance therap*" or "commitment therap*" or mindfulness or spirituality or meditation or "passive therap*" or massage or meditation or "mental healing" or relaxation or acupressure* or acupuncture or (behavior* adj2 (contract* or modification* or therap*)) or "cognitive therap*" or "cognitive rehab*" or "TENS unit*" or "heat therap*" or "distraction therap*" or "virtual reality therap*" or "guided imager*" or "parenteral fluid therap*" or (therap* adj2 fluid*)).ti,ab,hw,kw.                                                                                                                                                                                                                                                   | 534263  |
| 17 | exp psychotherapy/ or exp alternative medicine/ or exp Exercise Therapy/ or exp Exercise/ or exp yoga/ or exp complementary therapies/ or exp alternative medicine/                                                                                                                                                                                                                                                                                                                                                                                                                                                                                                                                                                                                                                                                                                             | 1041948 |
| 18 | exp pain/ or exp Chronic Pain/ or exp Headache/ or exp Headache Disorders/ or exp Back Pain/ or exp Neuralgia/ or exp Nociceptive Pain/ or exp Osteonecrosis/ or exp Migraine Disorders/ or exp Osteomyelitis/ or exp exp Low Back Pain/ or exp Neck Pain/ or exp Acute Pain/ or exp abdominal pain/ or exp knee pain/ or exp upper abdominal pain/ or exp lower abdominal pain/ or exp perineal pain/ or exp inguinal pain/ or exp face pain/ or exp pelvic pain/ or exp shoulder pain/ or exp flank pain/ or exp limb pain/ or exp noncardiac chest pain/ or exp spinal pain/ or exp epigastric pain/ or exp ankle pain/ or exp thorax pain/ or exp patellofemoral pain syndrome/ or exp leg pain/ or exp eye pain/ or exp skin pain/ or exp arm pain/ or exp hip pain/ or exp biliary tract pain/ or exp stomach pain/ or exp hand pain/ or exp heel pain/ or exp bone pain/ | 1500504 |
| 19 | transfusion therapy.mp. or exp blood transfusion/                                                                                                                                                                                                                                                                                                                                                                                                                                                                                                                                                                                                                                                                                                                                                                                                                               | 230346  |
| 20 | exp pain/                                                                                                                                                                                                                                                                                                                                                                                                                                                                                                                                                                                                                                                                                                                                                                                                                                                                       | 1397227 |
| 21 | exp pain/ or exp Chronic Pain/ or exp Headache/ or exp Headache Disorders/ or exp Back Pain/ or exp Neuralgia/ or exp Nociceptive Pain/ or exp Osteonecrosis/ or exp Migraine Disorders/                                                                                                                                                                                                                                                                                                                                                                                                                                                                                                                                                                                                                                                                                        | 1457204 |

|    |                                                                                                                                                                                                                                                                                                                                                                                                                                                                                                                                                                |         |
|----|----------------------------------------------------------------------------------------------------------------------------------------------------------------------------------------------------------------------------------------------------------------------------------------------------------------------------------------------------------------------------------------------------------------------------------------------------------------------------------------------------------------------------------------------------------------|---------|
| 22 | ("day hospital" or "acute pain center" or "acute pain clinic" or "observation unit" or "emergency department").ti,ab,hw,kw.                                                                                                                                                                                                                                                                                                                                                                                                                                    | 166747  |
| 23 | exp pain clinic/ or exp emergency ward/                                                                                                                                                                                                                                                                                                                                                                                                                                                                                                                        | 173791  |
| 24 | 20 and (6 or 7 or 8)                                                                                                                                                                                                                                                                                                                                                                                                                                                                                                                                           | 678800  |
| 25 | 16 or 17                                                                                                                                                                                                                                                                                                                                                                                                                                                                                                                                                       | 1374022 |
| 26 | 3 and (18 or 24) and 25                                                                                                                                                                                                                                                                                                                                                                                                                                                                                                                                        | 416     |
| 27 | 3 and (18 or 24) and (13 or 14 or 15)                                                                                                                                                                                                                                                                                                                                                                                                                                                                                                                          | 1099    |
| 28 | 3 and (18 or 24) and 19                                                                                                                                                                                                                                                                                                                                                                                                                                                                                                                                        | 1193    |
| 29 | 3 and (18 or 24) and (22 or 23)                                                                                                                                                                                                                                                                                                                                                                                                                                                                                                                                | 669     |
| 30 | 10 or 26 or 27                                                                                                                                                                                                                                                                                                                                                                                                                                                                                                                                                 | 2599    |
| 31 | limit 30 to (editorial or erratum or letter or note or addresses or autobiography or bibliography or biography or blogs or comment or dictionary or directory or interactive tutorial or interview or lectures or legal cases or legislation or news or newspaper article or overall or patient education handout or periodical index or portraits or published erratum or video-audio media or webcasts) [Limit not valid in Embase,Ovid MEDLINE(R),Ovid MEDLINE(R) Daily Update,Ovid MEDLINE(R) In-Process,Ovid MEDLINE(R) Publisher; records were retained] | 209     |
| 32 | 30 not 31                                                                                                                                                                                                                                                                                                                                                                                                                                                                                                                                                      | 2390    |
| 33 | 32 not (11 or 12)                                                                                                                                                                                                                                                                                                                                                                                                                                                                                                                                              | 2361    |
| 34 | limit 33 to (english language and yr="2010 -Current")                                                                                                                                                                                                                                                                                                                                                                                                                                                                                                          | 1250    |
| 35 | remove duplicates from 34                                                                                                                                                                                                                                                                                                                                                                                                                                                                                                                                      | 1063    |

## Question 4

Database(s): Embase 1988 to 2018 Week 19, Ovid MEDLINE(R) Epub Ahead of Print, In-Process & Other Non-Indexed Citations, Ovid MEDLINE(R) Daily and Ovid MEDLINE(R) 1946 to Present

Search Strategy:

| # | Searches                                                                                                                                                                                                                                                                                                                                                                                                                                                                                                                                                                                                                                                                                                                                                                                                                                                                                                                                                                                                                                                                                                                                                                                                                                                                                                                                                                                                                                                                                                                                                                                                                                                                                              | Results |
|---|-------------------------------------------------------------------------------------------------------------------------------------------------------------------------------------------------------------------------------------------------------------------------------------------------------------------------------------------------------------------------------------------------------------------------------------------------------------------------------------------------------------------------------------------------------------------------------------------------------------------------------------------------------------------------------------------------------------------------------------------------------------------------------------------------------------------------------------------------------------------------------------------------------------------------------------------------------------------------------------------------------------------------------------------------------------------------------------------------------------------------------------------------------------------------------------------------------------------------------------------------------------------------------------------------------------------------------------------------------------------------------------------------------------------------------------------------------------------------------------------------------------------------------------------------------------------------------------------------------------------------------------------------------------------------------------------------------|---------|
| 1 | sickle cell anemia.mp. or exp Anemia, Sickle Cell/                                                                                                                                                                                                                                                                                                                                                                                                                                                                                                                                                                                                                                                                                                                                                                                                                                                                                                                                                                                                                                                                                                                                                                                                                                                                                                                                                                                                                                                                                                                                                                                                                                                    | 49814   |
| 2 | ((((drepanocytic or "haemoglobin s" or "hemoglobin s" or "Hb SS" or hbs or sickle or "sickle cell" or sickling or ss) adj2 (anaemia* or anemia* or disease* or disorder*)) or drepanocytomia* or drepanocytoses or drepanocytosis or "haemoglobin SS" or "hemoglobin SS" or meniscocytoses or meniscocytosis).ti,ab,hw,kw.                                                                                                                                                                                                                                                                                                                                                                                                                                                                                                                                                                                                                                                                                                                                                                                                                                                                                                                                                                                                                                                                                                                                                                                                                                                                                                                                                                            | 52915   |
| 3 | 1 or 2                                                                                                                                                                                                                                                                                                                                                                                                                                                                                                                                                                                                                                                                                                                                                                                                                                                                                                                                                                                                                                                                                                                                                                                                                                                                                                                                                                                                                                                                                                                                                                                                                                                                                                | 55403   |
| 4 | exp pain/<br>exp Chronic Pain/ or exp Headache/ or exp Headache Disorders/ or exp Back Pain/ or exp Neuralgia/ or exp Nociceptive Pain/ or exp Osteonecrosis/ or exp Migraine Disorders/ or exp Osteomyelitis/ or exp exp Low Back Pain/ or exp Neck Pain/ or exp abdominal pain/ or exp knee pain/ or exp upper abdominal pain/ or exp lower abdominal pain/ or exp perineal pain/ or exp inguinal pain/ or exp face pain/ or exp pelvic pain/ or exp shoulder pain/ or exp flank pain/ or exp limb pain/ or exp noncardiac chest pain/ or exp spinal pain/ or exp epigastric pain/ or exp ankle pain/ or exp thorax pain/ or exp patellofemoral pain syndrome/ or exp leg pain/ or exp eye pain/ or exp skin pain/ or exp arm pain/ or exp hip pain/ or exp biliary tract pain/ or exp stomach pain/ or exp hand pain/ or exp heel pain/ or exp bone pain/<br>Acute Pain/ or exp Headache/ or exp Headache Disorders/ or exp Back Pain/ or exp Neuralgia/ or exp Nociceptive Pain/ or exp Osteonecrosis/ or exp Migraine Disorders/ or exp Osteomyelitis/ or exp Low Back Pain/ or exp Neck Pain/ or exp abdominal pain/ or exp knee pain/ or exp upper abdominal pain/ or exp lower abdominal pain/ or exp perineal pain/ or exp inguinal pain/ or exp face pain/ or exp pelvic pain/ or exp shoulder pain/ or exp flank pain/ or exp limb pain/ or exp noncardiac chest pain/ or exp spinal pain/ or exp epigastric pain/ or exp ankle pain/ or exp thorax pain/ or exp patellofemoral pain syndrome/ or exp leg pain/ or exp eye pain/ or exp skin pain/ or exp arm pain/ or exp hip pain/ or exp biliary tract pain/ or exp stomach pain/ or exp hand pain/ or exp heel pain/ or exp bone pain/ | 1421766 |
| 5 |                                                                                                                                                                                                                                                                                                                                                                                                                                                                                                                                                                                                                                                                                                                                                                                                                                                                                                                                                                                                                                                                                                                                                                                                                                                                                                                                                                                                                                                                                                                                                                                                                                                                                                       | 934957  |
| 6 | (pain or painful* or "Alice in Wonderland Syndrome*" or "atypical neuralgia*" or "atypical neuralgias" or "back ache*" or "back pain*" or backache* or backpain* or cephalalgia* or cephalgia* or cephalgia* or cephalodynia* or "cerebral pain*" or "chronic intractable pain*" or "chronic pain*" or "cranial pain*" or cranialgia* or "discogenic pain*" or "diskogenic pain*" or dorsalgia* or "head ache*" or "head pain*" or headache or headache* or hemicrania* or "inflammatory pain*" or "ischemic pain*" or lumbago or migraine* or migrainous or "Morton Neuroma*" or "nerve pain*" or neuralgia* or neurodynia* or "neuropathic pain*" or "nociceptive pain*" or "noncrisis pain*" or "non-crisis pain*" or "paroxysmal nerve pain*" or                                                                                                                                                                                                                                                                                                                                                                                                                                                                                                                                                                                                                                                                                                                                                                                                                                                                                                                                                  | 984263  |
| 7 |                                                                                                                                                                                                                                                                                                                                                                                                                                                                                                                                                                                                                                                                                                                                                                                                                                                                                                                                                                                                                                                                                                                                                                                                                                                                                                                                                                                                                                                                                                                                                                                                                                                                                                       | 1964883 |

"Piriformis Muscle Syndrome\*" or Sciatica\* or "somatic pain\*" or "status hemicranicus" or "stump neuralgia\*" or "sunct syndrome" or "tissue pain\*" or "vertebrogenic pain syndrome\*" or "Visceral Pain\*" or "widespread pain\*").ti,ab,hw,kw.

8 exp blood transfusion/ 220516

((plasma or blood or "red cell\*") adj3 (exchang\* or infus\* or replac\*)) or

9 hemotherap\* or "hemo-therap\*" or multitransfus\* or "plasma exchang\*" or 384616  
polytransfus\* or retransfus\* or transfus\*).ti,ab,hw,kw.

10 8 or 9 389066

11 exp emergency ward/ or exp pain clinic/ or exp outpatient department/ 227745

12 ("emergency depart\*" or "emergency room\*" or "emergency unit\*" or "pain clinic\*" 245296  
or "pain center\*" or "day hospital\*" or "observation unit\*").ti,ab,hw,kw.

13 11 or 12 347333

14 3 and (4 or 5 or 6 or 7) and (10 or 13) 3266

limit 14 to (editorial or erratum or letter or note or addresses or autobiography or  
bibliography or biography or blogs or comment or dictionary or directory or  
interactive tutorial or interview or lectures or legal cases or legislation or news or

15 newspaper article or overall or patient education handout or periodical index or 131  
portraits or published erratum or video-audio media or webcasts) [Limit not valid in  
Embase,Ovid MEDLINE(R),Ovid MEDLINE(R) Daily Update,Ovid MEDLINE(R)  
In-Process,Ovid MEDLINE(R) Publisher; records were retained]

16 14 not 15 3135

17 limit 16 to (english language and yr="2010 -Current") 1926

18 (exp animals/ or exp nonhuman/) not exp humans/ 9107689

((alpaca or alpacas or amphibian or amphibians or animal or animals or antelope or  
armadillo or armadillos or avian or baboon or baboons or beagle or beagles or bee or  
bees or bird or birds or bison or bovine or buffalo or buffaloes or buffalos or "c  
elegans" or "Caenorhabditis elegans" or camel or camels or canine or canines or  
carp or cats or cattle or chick or chicken or chickens or chicks or chimp or  
chimpanze or chimpanzees or chimps or cow or cows or "D melanogaster" or "dairy  
calf" or "dairy calves" or deer or dog or dogs or donkey or donkeys or drosophila or  
"Drosophila melanogaster" or duck or duckling or ducklings or ducks or equid or  
equids or equine or equines or feline or felines or ferret or ferrets or finch or finches  
or fish or flatworm or flatworms or fox or foxes or frog or frogs or "fruit flies" or  
"fruit fly" or "G mellonella" or "Galleria mellonella" or geese or gerbil or gerbils or 7805034  
goat or goats or goose or gorilla or gorillas or hamster or hamsters or hare or hares  
or heifer or heifers or horse or horses or insect or insects or jellyfish or kangaroo or  
kangaroos or kitten or kittens or lagomorph or lagomorphs or lamb or lambs or  
llama or llamas or macaque or macaques or macaw or macaws or marmoset or  
marmosets or mice or minipig or minipigs or mink or minks or monkey or monkeys  
or mouse or mule or mules or nematode or nematodes or octopus or octopuses or  
orangutan or "orang-utan" or orangutans or "orang-utans" or oxen or parrot or  
parrots or pig or pigeon or pigeons or piglet or piglets or pigs or porcine or primate  
or primates or quail or rabbit or rabbits or rat or rats or reptile or reptiles or rodent or

rodents or ruminant or ruminants or salmon or sheep or shrimp or slug or slugs or swine or tamarin or tamarins or toad or toads or trout or urchin or urchins or vole or voles or waxworm or waxworms or worm or worms or xenopus or "zebra fish" or zebrafish) not (human or humans or patient or patients)).ti,ab,hw,kw.

20 17 not (18 or 19) 1919  
 21 remove duplicates from 20 1557

### Questions 6,9

Database(s): Embase 1988 to 2017 Week 29, Ovid MEDLINE(R) Epub Ahead of Print, In-Process & Other Non-Indexed Citations, Ovid MEDLINE(R) Daily and Ovid MEDLINE(R) 1946 to Present

Search Strategy:

| #  | Searches                                                                                                                                                                                                                                                                                                                                                                                                                                                                                                                                                                                                                                                                                                                                                                                                                                                                                                                                                                                                               | Results |
|----|------------------------------------------------------------------------------------------------------------------------------------------------------------------------------------------------------------------------------------------------------------------------------------------------------------------------------------------------------------------------------------------------------------------------------------------------------------------------------------------------------------------------------------------------------------------------------------------------------------------------------------------------------------------------------------------------------------------------------------------------------------------------------------------------------------------------------------------------------------------------------------------------------------------------------------------------------------------------------------------------------------------------|---------|
| 1  | exp Anemia, Sickle Cell/<br>(((drepanocytic or "haemoglobin s" or "hemoglobin s" or "Hb SS" or hbs or sickle or "sickle cell" or sickling or ss) adj2 (anaemia* or anemia* or disease* or disorder*)) or drepanocytemia* or drepanocytoses or drepanocytosis or "haemoglobin SS" or "hemoglobin SS" or meniscocytoses or meniscocytosis).ti,ab,hw,kw.                                                                                                                                                                                                                                                                                                                                                                                                                                                                                                                                                                                                                                                                  | 46271   |
| 2  | 1 or 2                                                                                                                                                                                                                                                                                                                                                                                                                                                                                                                                                                                                                                                                                                                                                                                                                                                                                                                                                                                                                 | 51015   |
| 3  | 1 or 2                                                                                                                                                                                                                                                                                                                                                                                                                                                                                                                                                                                                                                                                                                                                                                                                                                                                                                                                                                                                                 | 53410   |
| 4  | exp pain/dt                                                                                                                                                                                                                                                                                                                                                                                                                                                                                                                                                                                                                                                                                                                                                                                                                                                                                                                                                                                                            | 213948  |
| 5  | exp Chronic Pain/dt [Drug Therapy]                                                                                                                                                                                                                                                                                                                                                                                                                                                                                                                                                                                                                                                                                                                                                                                                                                                                                                                                                                                     | 13534   |
| 6  | exp Headache/dt [Drug Therapy]                                                                                                                                                                                                                                                                                                                                                                                                                                                                                                                                                                                                                                                                                                                                                                                                                                                                                                                                                                                         | 11839   |
| 7  | exp Headache Disorders/dt                                                                                                                                                                                                                                                                                                                                                                                                                                                                                                                                                                                                                                                                                                                                                                                                                                                                                                                                                                                              | 35703   |
| 8  | exp Back Pain/dt [Drug Therapy]                                                                                                                                                                                                                                                                                                                                                                                                                                                                                                                                                                                                                                                                                                                                                                                                                                                                                                                                                                                        | 11479   |
| 9  | exp Neuralgia/dt [Drug Therapy]                                                                                                                                                                                                                                                                                                                                                                                                                                                                                                                                                                                                                                                                                                                                                                                                                                                                                                                                                                                        | 23671   |
| 10 | exp Nociceptive Pain/dt [Drug Therapy]<br>("Alice in Wonderland Syndrome*" or "atypical neuralgia*" or "atypical neuralgias" or "back ache*" or "back pain*" or backache* or backpain* or cephalalgia* or cephalea* or cephalgia* or cephalodynia* or "cerebral pain*" or "chronic intractable pain*" or "chronic pain*" or "cranial pain*" or cranialgia* or "discogenic pain*" or "diskogenic pain*" or dorsalgia* or "head ache*" or "head pain*" or headache or headache* or hemicrania* or "inflammatory pain*" or "ischemic pain*" or lumbago or migraine* or migrainous or "Morton Neuroma*" or "nerve pain*" or neuralgia* or neurodynia* or "neuropathic pain*" or "nociceptive pain*" or "noncrisis pain*" or "non-crisis pain*" or "paroxysmal nerve pain*" or "Piriformis Muscle Syndrome*" or Sciatica* or "somatic pain*" or "status hemicranicus" or "stump neuralgia*" or "sunct syndrome" or "tissue pain*" or "vertebrogenic pain syndrome*" or "Visceral Pain*" or "widespread pain*").ti,ab,hw,kw. | 529     |
| 11 | "ischemic pain*" or lumbago or migraine* or migrainous or "Morton Neuroma*" or "nerve pain*" or neuralgia* or neurodynia* or "neuropathic pain*" or "nociceptive pain*" or "noncrisis pain*" or "non-crisis pain*" or "paroxysmal nerve pain*" or "Piriformis Muscle Syndrome*" or Sciatica* or "somatic pain*" or "status hemicranicus" or "stump neuralgia*" or "sunct syndrome" or "tissue pain*" or "vertebrogenic pain syndrome*" or "Visceral Pain*" or "widespread pain*").ti,ab,hw,kw.                                                                                                                                                                                                                                                                                                                                                                                                                                                                                                                         | 637608  |

|                                                                                                                                                                                                                                                                                                                                                                                                                                                                                                                                                                                                                                                                                                                                                                                                                                                                                                                                       |        |
|---------------------------------------------------------------------------------------------------------------------------------------------------------------------------------------------------------------------------------------------------------------------------------------------------------------------------------------------------------------------------------------------------------------------------------------------------------------------------------------------------------------------------------------------------------------------------------------------------------------------------------------------------------------------------------------------------------------------------------------------------------------------------------------------------------------------------------------------------------------------------------------------------------------------------------------|--------|
| 12 4 and 11                                                                                                                                                                                                                                                                                                                                                                                                                                                                                                                                                                                                                                                                                                                                                                                                                                                                                                                           | 84050  |
| 13 5 or 6 or 7 or 8 or 9 or 10 or 12                                                                                                                                                                                                                                                                                                                                                                                                                                                                                                                                                                                                                                                                                                                                                                                                                                                                                                  | 96323  |
| 14 3 and 13                                                                                                                                                                                                                                                                                                                                                                                                                                                                                                                                                                                                                                                                                                                                                                                                                                                                                                                           | 332    |
| 15 exp narcotic analgesic agent/                                                                                                                                                                                                                                                                                                                                                                                                                                                                                                                                                                                                                                                                                                                                                                                                                                                                                                      | 233744 |
| 16 exp Analgesics, Opioid/<br>(acetorphine or acetylcodeine or acetylmethadol or Alfentanil or Alphaprodine or anileridine or apadoline or azidomorphine or benzhydrocodone or bezitramide or bremazocine or "Brompton mixture" or Buprenorphine or Butorphanol or ciramadol or cocodamol or Codeine or codydramol or conorfone or cyclazocine or Dextromoramide or Dextropropoxyphene or dextrorphan or dezocine or diamorphine or diconal or dihydrocodeine or dihydroetorphine or Dihydromorphine or dimethylthiambutene or Diphenoxylate or dipipanone or enadoline or eptazocine or ethylketazocine or Ethylketocyclazocine or Ethylmorphine or etonitazene or Etorphine or etoxeridine or faxeladol or Fentanyl or furethidine or gelonida or Heroin or Hydrocodone or isalmadol or isomethadone or ketazocine or ketobemidone or ketogan or kyotorphin or lefetamine or                                                        | 337517 |
| 17 levacetylmethadol or levomethadone or Levorphanol or Meperidine or Meptazinol or metazocine or Methadone or "Methadyl Acetate" or methylsamidorphane or Morphine or "morphinomimetic agent*" or "morphinomimetic drug*" or morphinone or Nalbuphine or narcotic* or nicocodine or nicomorphine or noracymethadol or norbuprenorphine or nordextropropoxyphene or normorphine or norpethidine or norpropoxyphene or "o nortramadol" or oliceridine or opiate or Opiate* or opioid* or Opium or oripavine or Oxycodone or Oxymorphone or pentamorphone or Pentazocine or pethidine or phenadoxone or phenaridine or Phenazocine or phencyclidine or Phenoperidine or picenadol or piminodine or Pirinitramide or piritramide or profadol or Promedol or propiram or sameridine or samidorphan or semorphone or Sufentanil or tapentadol or thebaine or tipladom or Tilidine or tonazocine or Tramadol or trimeperidine).ti,ab,hw,kw. | 511554 |
| 18 exp Serotonin Uptake Inhibitors/<br>("5 ht uptake inhibitor*" or "5 hydroxytryptamine uptake inhibitor*" or "5-ht uptake inhibitor*" or "5-hydroxytryptamine uptake inhibitor*" or "Amine reuptake inhibitor*" or Amoxapine or cericlamine or Citalopram or Clomipramine or dapoxetine or escitalopram or femoxetine or Fenfluramine or Fluoxetine or Fluvoxamine or hydroxynefazodone or hyperforin or ifoxetine or litoxetine or                                                                                                                                                                                                                                                                                                                                                                                                                                                                                                 | 198820 |
| 19 lubazodone or medifoxamine or moxifetin or nefazodone or nefopam or nomelidine or norcitalopram or Norfenfluramine or norfluoxetine or norsertraline or omiloxetine or Paroxetine or "selective serotonin reuptake inhibitor*" or "serotonin noradrenalin reuptake inhibitor*" or "serotonin reuptake inhibitor*" or "serotonin specific reuptake inhibitor*" or "serotonin uptake inhibitor*" or Sertraline or SSRI or tedatioxetine or Trazodone or vilazodone or vortioxetine or Zimeldine).ti,ab,hw,kw.                                                                                                                                                                                                                                                                                                                                                                                                                        | 165716 |
| 20 exp membrane stabilization/                                                                                                                                                                                                                                                                                                                                                                                                                                                                                                                                                                                                                                                                                                                                                                                                                                                                                                        | 2576   |
| 21 ("Membrane stabilis*" or "Membrane stabiliz*").ti,ab,hw,kw.                                                                                                                                                                                                                                                                                                                                                                                                                                                                                                                                                                                                                                                                                                                                                                                                                                                                        | 5720   |
| 22 exp Anti-Inflammatory Agents, Non-Steroidal/                                                                                                                                                                                                                                                                                                                                                                                                                                                                                                                                                                                                                                                                                                                                                                                                                                                                                       | 628692 |



|    |                                                                                                                                                                                                                                                                                                                                                                                                                                                                                                                                                                                                                                                                                                                                                                                                                                                                                                                                                                                                                                                                                                                                                                                                          |        |
|----|----------------------------------------------------------------------------------------------------------------------------------------------------------------------------------------------------------------------------------------------------------------------------------------------------------------------------------------------------------------------------------------------------------------------------------------------------------------------------------------------------------------------------------------------------------------------------------------------------------------------------------------------------------------------------------------------------------------------------------------------------------------------------------------------------------------------------------------------------------------------------------------------------------------------------------------------------------------------------------------------------------------------------------------------------------------------------------------------------------------------------------------------------------------------------------------------------------|--------|
| 23 | exp cyclooxygenase inhibitors/                                                                                                                                                                                                                                                                                                                                                                                                                                                                                                                                                                                                                                                                                                                                                                                                                                                                                                                                                                                                                                                                                                                                                                           | 523389 |
| 24 | exp cyclooxygenase 2 inhibitors/                                                                                                                                                                                                                                                                                                                                                                                                                                                                                                                                                                                                                                                                                                                                                                                                                                                                                                                                                                                                                                                                                                                                                                         | 57263  |
| 25 | Aspirin/                                                                                                                                                                                                                                                                                                                                                                                                                                                                                                                                                                                                                                                                                                                                                                                                                                                                                                                                                                                                                                                                                                                                                                                                 | 195771 |
| 26 | sulindac/<br>(Aceclofenac or Acemetacin or "Acetylsalicylic acid" or Alclofenac or Aminopyrine or Amodiaquine or Amoxiprin or Ampyrone or Antipyrine or Apazone or Aspirin or Azapropazone or Benorilate or Benorylate or Bromelains or Bromfenac or "BW-755C" or Celecoxib or "Choline magnesium salicylate" or "Choline magnesium trisalicylate" or clinoril or Clofazimine or Clofezone or Clonixin or "COX-1 inhibitor*" or "COX-2 inhibitor*" or "COX-2 selective inhibitor*" or Coxib* or Curcumin or "Cyclooxygenase 1 inhibitor*" or "Cyclooxygenase 2 inhibitor*" or "Cyclooxygenase inhibitor*" or "Cyclooxygenase inhibitor*" or Dapsone or Dexibuprofen or Dexketoprofen or Diclofenac or Diflunisal or Dipyrone or Droxicam or Epirizole or Ethenzamide or Etodolac or Etoricoxib or Faislamine or Fenbufen or Fenoprofen or "Flufenamic acid" or Flunoxaprofen or Flurbiprofen or "Glycyrrhizic Acid" or Ibuprofen or                                                                                                                                                                                                                                                                      | 6400   |
| 27 | Ibuproxam or Indomethacin or Indoprofen or Kebuzone or Ketoprofen or Ketorolac or Licofelone or Lornoxicam or Loxoprofen or Lumiracoxib or "Magnesium salicylate" or "Meclofenamic Acid" or "Mefenamic Acid" or Meloxicam or Mesalamine or Metamizole or "Methyl salicylate" or Mofebutazone or Nabumetone or Naproxen or "Niflumic Acid" or "Nonsteroidal antiinflammator*" or "Nonsteroidal anti-inflammator*" or "Non-steroidal antiinflammator*" or "Non-steroidal anti-inflammator*" or "Nordihydroguaiaretic Acid" or NSAID* or osenal or Oxametacin or Oxaprozin or Oxyphenbutazone or Parecoxib or "Pentosan Sulfuric Polyester" or Phenazone or Phenylbutazone or Piroxicam or Pirprofen or Prenazone or Proglumetacin or Rofecoxib or Salicylamide or Salicylate or Sulfasalazine or Sulfinpyrazone or Sulindac or Suprofen or Tenoxicam or "Tiaprofenic acid" or "Tolfenamic acid" or Tolmetin or Valdecoxib).mp.                                                                                                                                                                                                                                                                             | 641909 |
| 28 | 22 or 23 or 24 or 25 or 26 or 27                                                                                                                                                                                                                                                                                                                                                                                                                                                                                                                                                                                                                                                                                                                                                                                                                                                                                                                                                                                                                                                                                                                                                                         | 799582 |
| 29 | exp n methyl dextro aspartic acid receptor blocking agent/<br>(aptiganel or arcaine or besonprodil or bicifadine or "conantokin G" or "conantokin T" or delucemine or deudextromethorphan or dimiracetam or dizocilpine or eliprodil or esketamine or etoxadrol or gacyclidine or "gamma dextro glutamylglycine" or "gamma glutamylaspartic acid" or "gamma glutamylglycine" or gavestinel or ifenprodil or indantadol or ketamine or lacosamide or lanicemine or memantine or midafotel or "n methyl d aspartate antagonist*" or "n methyl d aspartate blocker*" or "n methyl d aspartate blocking agent*" or "n methyl d aspartate receptor antagonist*" or "n methyl d aspartate receptor blocker*" or "n methyl d aspartate receptor blocking agent*" or "n methyl d aspartic acid antagonist*" or "n methyl d aspartic acid blocker*" or "n methyl d aspartic acid blocking agent*" or "n methyl d aspartic acid receptor antagonist*" or "n methyl d aspartic acid receptor blocker*" or "n methyl d aspartic acid receptor blocking agent*" or "n methyl dextro aspartate antagonist*" or "n methyl dextro aspartate blocker*" or "n methyl dextro aspartate blocking agent*" or "n methyl dextro | 61257  |
| 30 | aspartate receptor antagonist*" or "n methyl d aspartate receptor blocker*" or "n methyl d aspartate receptor blocking agent*" or "n methyl d aspartic acid antagonist*" or "n methyl d aspartic acid blocker*" or "n methyl d aspartic acid blocking agent*" or "n methyl d aspartic acid receptor antagonist*" or "n methyl d aspartic acid receptor blocker*" or "n methyl d aspartic acid receptor blocking agent*" or "n methyl dextro aspartate antagonist*" or "n methyl dextro aspartate blocker*" or "n methyl dextro aspartate blocking agent*" or "n methyl dextro                                                                                                                                                                                                                                                                                                                                                                                                                                                                                                                                                                                                                            | 99948  |

aspartate receptor antagonist\*" or "n methyl dextro aspartate receptor blocker\*" or "n methyl dextro aspartate receptor blocking agent\*" or "n methyl dextro aspartic acid antagonist\*" or "n methyl dextro aspartic acid blocker\*" or "n methyl dextro aspartic acid blocking agent\*" or "n methyl dextro aspartic acid receptor antagonist\*" or "n methyl dextro aspartic acid receptor blocker\*" or "n methyl dextro aspartic acid receptor blocking agent\*" or neramexane or "NMDA antagonist\*" or "NMDA blocker\*" or "NMDA blocking agent\*" or "NMDA receptor antagonist\*" or "NMDA receptor antagonists" or "NMDA receptor blocker\*" or "NMDA receptor blocking agent\*" or perzinfotel or radiprodil or tiletamine or "tiletamine plus zolazepam" or traxoprodil).ti,ab,hw,kw.

31 exp adrenergic receptor stimulating agent/ 341752

32 exp Adrenergic Agonists/ 554047

("adrenalin borate" or "adrenalin hydrogen tartrate" or "adrenergic agent\*" or "adrenergic agonist\*" or "Adrenergic alpha-1 Receptor agonist\*" or "Adrenergic alpha-2 Receptor agonist\*" or "Adrenergic alpha-agonist\*" or "Adrenergic beta-1 Receptor agonist\*" or "Adrenergic beta-2 Receptor agonist\*" or "Adrenergic beta-3 Receptor agonist\*" or "Adrenergic beta-agonist\*" or "adrenergic drug\*" or "adrenergic receptor agonist\*" or "adrenergic receptor stimulant" or "adrenergic receptor stimulating agent\*" or "adrenergic receptor stimulator\*" or "adrenergic stimulant" or "adrenergic stimulating agent\*" or "adrenergic stimulator\*" or "adrenoceptor agonist\*" or "adrenoceptor stimulating agent\*" or "adrenoceptor stimulator\*" or "adrenogenic agent\*" or "adrenomimetic agent\*" or adrenomimetics or Albuterol or "alpha adrenergic receptor stimulating agent\*" or amezinium or "amezinium metilsulfate" or "aminergic agent\*" or "aminergic drug\*" or arbutamine or besipirdine or "beta adrenergic receptor stimulating agent\*" or "Brimonidine Tartrate" or buphenine or cathinone or chlorphentermine or Clenbuterol or Clonidine or cyclopentamine or deterenol or Dexmedetomidine or dipivefrine or Dobutamine or dopamine or ephedrine or Epinephrine or Ergotamine or Etilefrine or fenfluramine or Fenoterol or "Formoterol Fumarate" or Guanabenz or Guanfacine or Hexoprenaline or Isoetharine or Isoproterenol or Isoxsuprine or lerimazoline or mazindol or Medetomidine or Mephentermine or metadrenalin or Metaproterenol or Metaraminol or Methoxamine or Methyldopa or Midodrine or Naphazoline or Nebivolol or neocobefrin or Norepinephrine or norfenfluramine or normetadrenalin or Nylidrin or Octopamine or ornade or oxidopamine or oxilofrine or Oxyfedrine or Oxymetazoline or phendimetrazine or phenmetrazine or Phenylephrine or Phenylpropanolamine or pholedrine or Prenalterol or Procatamol or propylhexedrine or pseudoephedrine or racephedrine or racepinephrine or Racepinephrine or Ritodrine or "Salmeterol Xinafoate" or "sympathetic drug\*" or sympathicomimetic or "sympathicomimetic agent\*" or "sympathicotropic agent\*" or sympathomimetic or "sympathomimetic agent\*" or "sympathomimetic drug\*" or sympathomimetics or Synephrine or Terbutaline or transmer or Tretoquinol or tyramine or Xamoterol or Xylazine).ti,ab,hw,kw.

33 or Clenbuterol or Clonidine or cyclopentamine or deterenol or Dexmedetomidine or dipivefrine or Dobutamine or dopamine or ephedrine or Epinephrine or Ergotamine or Etilefrine or fenfluramine or Fenoterol or "Formoterol Fumarate" or Guanabenz or Guanfacine or Hexoprenaline or Isoetharine or Isoproterenol or Isoxsuprine or lerimazoline or mazindol or Medetomidine or Mephentermine or metadrenalin or Metaproterenol or Metaraminol or Methoxamine or Methyldopa or Midodrine or Naphazoline or Nebivolol or neocobefrin or Norepinephrine or norfenfluramine or normetadrenalin or Nylidrin or Octopamine or ornade or oxidopamine or oxilofrine or Oxyfedrine or Oxymetazoline or phendimetrazine or phenmetrazine or Phenylephrine or Phenylpropanolamine or pholedrine or Prenalterol or Procatamol or propylhexedrine or pseudoephedrine or racephedrine or racepinephrine or Racepinephrine or Ritodrine or "Salmeterol Xinafoate" or "sympathetic drug\*" or sympathicomimetic or "sympathicomimetic agent\*" or "sympathicotropic agent\*" or sympathomimetic or "sympathomimetic agent\*" or "sympathomimetic drug\*" or sympathomimetics or Synephrine or Terbutaline or transmer or Tretoquinol or tyramine or Xamoterol or Xylazine).ti,ab,hw,kw. 812716

34 exp Cannabinoids/ 59857

35 ("ajulemic acid" or anandamide or cannabichromene or Cannabidiol or cannabielsoin or cannabigerol or cannabinoid\* or Cannabinol or cannabis or 98406

deacetyllevonantradol or "delta8 tetrahydrocannabinol" or "delta8 tetrahydrocannabinol derivative" or "delta9 11 tetrahydrocannabinol" or dexanabinol or dextronantradol or Dronabinol or endocannabinoid or levonantradol or methanandamide or "n oleoylethanolamine" or nabiximols or nantradol or "noladin ether" or palmidrol or tetrahydrocannabinol or "tetrahydrocannabinolic acid" or virodhamine).ti,ab,hw,kw.

36 exp Anesthetics, Local/

268656

(amydracaine or amylocaine or "anaesthetic wipe\*" or "anesthetic wipe\*" or articaine or "articainic acid" or aslavital or Benzocaine or benzofurocaine or "Benzyl Alcohol" or bucracaine or bumecaine or Bupivacaine or butacaine or butanilicaine or butethamine or butoxycaine or butylcaine or carbisocaine or "carcainium chloride" or Carticaine or centbucridine or cetacaine or chloroprocaine or cinchocaine or Cocaine or "conduction blocking anaesthetic\*" or "conduction blocking anesthetic\*" or cyclomethycaine or Dibucaine or dimethocaine or dipiperdon or Diphenhydramine or dyclonine or "Ethyl Chloride" or Etidocaine or eugenol or euprocine or fluress or fomocaine or guafecainol or heptacaine or

37 hexathricin or hexylcaine or instillagel or ipravacaine or isobutamben or ketocaine 454359

or levobupivacaine or lidamidine or Lidocaine or "local anaesthetic\*" or "local anesthetic\*" or Mepivacaine or meprylcaine or metabutethamine or myrtecaine or oxetacaine or oxybuprocaine or pentacaine or phenacaine or phenol or piperocaine or polidocanol or pramocaine or Prilocaine or Procaine or propanocaine or propipocaine or Propoxycaine or propylcaine or proxymetacaine or pseudococaine or pyrrocaine or quinisocaine or ropivacaine or "spinal anaesthetic\*" or "spinal anesthetic\*" or tanax or Tetracaine or Tetrodotoxin or tolycaine or "topical anaesthetic\*" or "topical anesthetic\*" or tricaine or Trimecaine or xyloproct or zolamine).ti,ab,hw,kw.

38 exp opiate antagonist/

63526

39 exp Narcotic Antagonists/

77545

(alvimopan or anatibant or aprepitant or axelopran or befetupitant or "beta endorphin1-27" or "beta funaltrexamine" or bevenopran or binaltorphimine or "bombesin antagonist\*" or "bradykinin antagonist\*" or "bradykinin B1 receptor antagonist\*" or "bradykinin B2 receptor antagonist\*" or Buprenorphine or burapitant or Butorphanol or casopitant or chlornaltrexamine or ciramadol or clocinnamox or Cyclazocine or cyclofoxy or cyprodime or dapitant or "delta opiate receptor antagonist\*" or deltibant or dextrallorphan or dezocine or Diprenorphine or eluxadoline or "epsilon opiate receptor antagonist\*" or eptazocine or ezlopitant or "fasitibant chloride" or "fentanyl isothiocyanate" or fezolinetant or figopitant or "fk 224" or fosaprepitant or fosnetupitant or "gr 231118" or ibodutant or "kappa opiate receptor antagonist\*" or "l 759274" or lanepitant or "leucine enkephalin2 dextro alanine 6 cysteine" or Levallorphan or maropitant or meclinertant or "men 10627" or Meptazinol or methylsamidorphane or "mu opiate receptor antagonist\*" or Nalbuphine or naldemedine or nalmefene or Nalorphine or naloxazone or naloxegol or naloxonazine or Naloxone or naltrexamine or naltrexol or naltrexonazine or Naltrexone or naltriben or naltrindole or "narcotic antagonist\*" or nepadutant or netupitant or "neurokinin 1 receptor antagonist\*" or "neurokinin 2

40 or "fasitibant chloride" or "fentanyl isothiocyanate" or fezolinetant or figopitant or "fk 224" or fosaprepitant or fosnetupitant or "gr 231118" or ibodutant or "kappa opiate receptor antagonist\*" or "l 759274" or lanepitant or "leucine enkephalin2 dextro alanine 6 cysteine" or Levallorphan or maropitant or meclinertant or "men 10627" or Meptazinol or methylsamidorphane or "mu opiate receptor antagonist\*" or Nalbuphine or naldemedine or nalmefene or Nalorphine or naloxazone or naloxegol or naloxonazine or Naloxone or naltrexamine or naltrexol or naltrexonazine or Naltrexone or naltriben or naltrindole or "narcotic antagonist\*" or nepadutant or netupitant or "neurokinin 1 receptor antagonist\*" or "neurokinin 2

128220

receptor antagonist\*" or "neurokinin 3 receptor antagonist\*" or "neuropeptide FF" or "neuropeptide Y 22-27" or "neuropeptide Y receptor antagonist\*" or "neurotensin receptor antagonist\*" or "neurotensin11 dextro tryptophan" or "nociceptin receptor antagonist\*" or noltipantium or norbinaltorphimine or ondelopran or "opiate antagonist\*" or "opiate receptor antagonist\*" or "opiate receptor blocker\*" or "opiate receptor blocking agent\*" or "opioid antagonist\*" or "opioid receptor antagonist\*" or "opioid receptor blocker\*" or "opioid receptor blocking agent\*" or "orexin receptor antagonist\*" or orvepitant or osanetant or oxilorphan or oxymorphindole or Pentazocine or picenadol or profadol or quadazocine or "rc 3095" or rolapitant or safotibant or samidorphan or saredutant or serlopitant or spantide or "substance P antagonist\*" or "tachykinin receptor antagonist\*" or talnetant or telmapitant or tonazocine or tradipitant or "urotensin receptor antagonist\*" or velneperit or vestipitant or vofopitant).ti,ab,hw,kw.

- 41 exp Adrenal Cortex Hormones/ 1057672
- 42 exp corticosteroid/ 679671
- 43 exp corticosteroid therapy/ 39614
- ("adrenal cortex hormone\*" or "adrenal cortex steroid\*" or "adrenal cortical hormone\*" or "adrenal cortical steroid\*" or "adrenal steroid\*" or "adreno cortical steroid\*" or "adreno corticosteroid\*" or "adrenocortical hormone\*" or "adrenocortical steroid\*" or adrenocorticosteroid\* or adreson or alclometasone or aldosterone or algestone or "algestone acetonide" or amcinonide or amelometasone or beclometasone or budesonide or butixocort or chloroprednisone or ciclesonide or ciprocinonide or clioquinol or clobetasol or clobetasone or clocortolone or cloprednol or "cortical steroid\*" or corticalsteroid\* or "cortico steroid\*" or corticoid\* or corticosteroid\* or corticosterone or corticotherap\* or cortifair or cortisol or cortisone or cortivazol or cortril or deflazacort or dehydrocorticosterone or dehydrocortisone or deoxycorticosterone or dermocorticosteroid\* or dexamethasone or diflorasone or diflucortolone or difluprednate or domoprednate or drocinonide or dutimelan or epicortisol or "etiprednol dicloacetate" or fluclorolone or fludrocortisone or fludroxycortide or flumetasone or flumoxonide
- 44 or flunisolide or fluocinolone or fluocinonide or fluocortin or fluocortolone or 1663935
- fluorometholone or fluprednidene or fluprednisolone or fluticasone or formocortal or "formoterol fumarate" or Glucocorticoid\* or glucocorticoidsteroid\* or glucocorticosteroid\* or glucocortoid\* or glycocorticoid\* or glycocorticosteroid\* or halcinonide or halometasone or halopredone or hydrocortisone or "hydroxy norcorticosterone" or hydroxycorticoid\* or hydroxycorticosteroid\* or hydroxycorticosterone or hydroxydeoxycorticosterone or hydroxyhydrocortisone or "icometasone enbutate" or isoflupredone or itrocinnonide or "locicortolone dicibate" or "lorinden a" or "lorinden t" or loteprednol or mazipredone or medrysone or meprednisone or mineralcorticosteroid\* or mineralocorticosteroid\* or minerocorticoid\* or "mometasone furoate" or nicocortonide or nivacortol or nordeoxycorticosterone or oropivalone or oxohydrocortisone or oxycorticosteroid\* or paramethasone or prednisolone or prednisone or pregnenolone or procinonide or promestriene or resocortol or rimexolone or rofleponide or steroid\* or tetrahydrodeoxycorticosterone or ticabesone or timobesone or tipredane or

tixocortol or triamcinolone or "ulobetasol propionate" or uniderm or zoticasone).ti,ab,hw,kw.

45 41 or 42 or 43 or 44 1720252

46 exp Vitamin D/ 156262

((vit\* adj (d or d2 or d3)) or "20 epicalcetriol\*" or "22 oxacalcitriol\*" or "25 hydroxyergocalciferol\*" or "25 hydroxyvitamin D" or "25 OH D" or "25 OH D3" or "25-hydroxycholecalciferol\*" or "25-hydroxyergocalciferol\*" or "25-OH D" or "25-OH D3" or 25OHD or "25-OHD" or "25-OH-D" or 25OHD3 or "25-OHD3" or alfacalcidol\* or atocalcitol\* or becocalcidiol\* or calcidiol\* or Calcifediol\* or

47 calciferol\* or calcipotriol\* or calcitriol\* or Cholecalciferol\* or colecalciferol\* or 199830

dihydrotachysterol\* or dihydroxycolecalciferol\* or "dihydroxyvitamin D" or doxercalciferol\* or ecalcidene or eldecalcitol\* or elocalcitol\* or Ergocalciferol\* or falecalcitriol\* or hydroxycolecalciferol\* or inecalcitol\* or lexacalcitol\* or lunacalcipol\* or paricalcitol\* or pefcalcitol\* or secalciferol\* or seocalcitol\* or tascalcitol\* or tisocalcitate).ti,ab,hw,kw.

48 exp ascorbic acid/ 108163

("acidum ascorbicum" or acidyлина or adenex or "afj c" or agrumina or allercorb or allescorb or "antiscorbutic vitamin" or "arcavit c" or "arcavite c" or "arkovital c" or ascelat or ascofar or ascomed or asconvita or ascor or "ascor l 500" or ascorbate or "ascorbate sodium" or "ascorbic acid" or "ascorbic acid potassium salt" or ascorbicap or ascorbicin or ascorbico or ascorbin or ascorbina or "ascorbinic acid" or ascorbit or ascorbite or ascorbitol or ascorbivit or ascorbivite or ascorbone or ascorbutina or ascorbyl or ascorbyn or ascorcee or ascorgil or ascorin or ascormin or ascorteal or ascorval or ascorvel or ascorvit or ascorvite or ascorvitina or askorbin or "austrovit c" or "austrovite c" or "bentavit c" or "bentavite c" or "c crivit" or "c ine" or "c level" or "c lisa" or "c long" or "c monovit" or "c monovite" or "c prana" or "c rivitin" or "c rivitine" or "c sol" or "c tamin" or "c tamine" or "c tonic" or "c tron" or "c vescent" or "c vicotrat" or "c vicotrate" or "c vimin" or "c vimine" or "c vit" or "c vita" or "c vital" or "c vitam" or "c vite" or cantan or cantaxin or "catavin c" or "ce arom" or "ce limo" or "ce major" or "ce quin" or "ce

49 quine" or "ce vi sol" or "ce vita" or "ce vitan" or cebetate or cebicure or cebion or 156992

cebione or cecap or cecon or "cecon drops" or "cecon solution" or cecone or cecorbin or cecorbine or cecorbyl or cecorbyle or cecrisina or cedon or cedone or cedoxon or cedoxone or "cee-500" or ceevifil or cegiolan or celaskon or celaskone or celin or celine or cenetone or cenol or cenolate or cequinyl or cereon or cergona or cescorbat or cetamican or cetamid or "cetamin knoll australia" or cetamine or "cetamin knoll australia" or cetebe or ceterapion or ceterapione or cetrinets or cevalin or cevaline or cevatine or cevex or cevibram or cevigal or cevigen or cevigol or cevilat or cevimin or cevimine or cevisol or "ce-vi-sol" or cevit or cevita or "cevitamic acid" or cevitamin or "cevitaminic acid" or "cevitaminum kolin" or cevitane or cevite or cevitex or cevitil or cevitol or cewin or chewcee or "chivibit c" or "ci drol" or ciamin or "ciamina ormo" or ciergin or cifilina or cipca or cisir or cital or citamino or cith or citoascorbina or citoxyl or citran or citravite or citritabs or citrovitamina or civigor or civitin or civitine or "co biagini" or concemin or cortalex or "c-vimin" or "c-will" or "d ascorbic acid" or "d xyloascorbic acid" or

dagrascorbin or "dagravit c" or "dancimin c" or "davitamon c" or dayvital or "delo c" or "difvitamin c" or "dumovit c" or "dumovite c" or "e ascorbic acid" or "e xyloascorbic acid" or "erftamin c" or "erftamine c" or esuron or esurvit or esurvite or "ferrous ascorbate" or flavettes or "godabion c" or "gregovite c" or hiece or hybrin or "ido c" or ikacee or "inovitan c" or irocevit or irocevite or jarexin or jarexine or "l 3 keto hexuronic acid lactone" or "l ascorbic acid" or "l xylo ascorbic acid" or "l xyloascorbic acid" or lacivit or lacivite or laroscorbine or "l-ascorbic acid" or "leder c" or "leder-c" or lemascorb or "levo ascorbate" or "levo ascorbic acid" or limcee or "limo ce" or "liqui cee" or "magnesium ascorbate" or "magnesium ascorbicum" or "magnesium di l ascorbate" or "magnesium di-l-ascorbate" or magnorbin or "mega-ca plus" or myascorbin or natrascorb or "novo ascorbic" or nybadol or "paa 500" or "parkovit c" or pharmascorbine or "pharmatovit c" or "pharmatovite c" or "planavit c" or "planavite c" or "plivit c" or "plivite c" or "potassium ascorbate" or "pro-c" or proscorbin or proscorbine or redoxon or "redoxon c" or "redoxon forte" or ribena or scorbacid or scorbacide or scorbettes or scorbex or "scorbin c" or scorbitol or scorbumine or "scottavit c" or "scottavite c" or secorbate or sevalin or "sigmavit c" or "sigmavite c" or sodascorbate or "sodium ascorbate" or "sodium l ascorbate" or sweetcee or "synum c" or "take-c" or "tanvimil-c" or testascorbic or "ucemine c" or "upsa c" or "upsa-c" or "vi ci sin" or "vi dom c" or "vi-c 500" or vicef or vicelat or vicetrin or "vici monico" or viciman or vicin or vicitina or vicon or viforcit or viforcite or viscorin or viscorine or vitac or vitace or "vita-cedol orange" or vitacee or vitaci or vitacimin or vitacimine or vitacin or vitacine or "vitamin C" or "vitamin c 1" or "vitaplex c" or vitapric or "vitapur c" or "vitasan c" or vitascorbin or vitascorbine or vitascorbol or "vitascorbol 500" or "vitelix c" or vitocee or vorange or "wandervit c" or "wandervite c" or "witamina c" or xitix or "xon-ce" or "xyloascorbic acid").ti,ab,hw,kw.

50 exp Vitamin A/

72189

("a fil" or "a mulsal" or "a mulsin" or "a mulsine" or "a sol" or "a vi pel" or "a vit" or "a vitadit" or "a vitamin" or "a vitan" or a313 or acon or acrisina or acrisine or "actifral a" or adatone or afaxin or afaxine or afilina or afile or agiolan or "alcovit a" or "alfa monovite" or "alfa sir" or alfaergin or alfaergine or alfamin or alfamine or alfamonovit or alfasir or alfasole or alfasterolo or alfatar or alfavena or alfavene or alfavitina or alfavitine or alfene or "all trans retinol" or alphalin or alphaline or alphasterol or amulsal or amulsin or amulsine or amulvit or anatola or anatole or anavit or "anti infective vitamin" or "antixerophthalmic vitamin" or aoral or apexol or apostavit or "aquadol a" or "arcavit A" or asol or asteril or atav or aterapion or avibon or "avibon theraplix" or avimin or avimine or avipel or avipur or avit or avitabiol or avitadit or avital or "avitaminum kolin" or avitan or avitana or avitane or avite or avitil or avitina or avitol or avogina or avogine or avoleum or axerodina or axerodine or axerol or axerophthol or axerophthylum or "bentavit a" or "bentavite a" or "bio tan" or biosterol or biotan or "chivibit a" or cytobiase or "dagravit a" or "davitamon a" or "difvitamin a" or "dohyfral a" or "elageno a" or "endo a" or "envit a" or epiteliol or "evitol zambeletti" or fletase or gadeol or gadol or halivitan or halivitane or "homagenets aoral" or hydrosol or "ido a" or "ido a 50" or idratene or "inovitan a" or "lord factor" or meditalfa or "mulsal a" or multamine

51

116518

|                                                                                                                                                                                                                                                                                                                                                                                                                                                                                                                                                                                                                                                   |          |
|---------------------------------------------------------------------------------------------------------------------------------------------------------------------------------------------------------------------------------------------------------------------------------------------------------------------------------------------------------------------------------------------------------------------------------------------------------------------------------------------------------------------------------------------------------------------------------------------------------------------------------------------------|----------|
| or "nio a let" or "oleovit a" or "oleovitamin a" or ophthalamine or panvita or "plivit a" or prepalin or prepaline or "preparato a" or primavit or quotivit or retinol or "retinol alcohol" or "retinyl alcohol" or "ro a vit" or "ro-a-vit" or "super a" or testavol or Tretinoin or "ucemine a" or vaconex or vaflool or veroftal or "vi alpha" or "vi dom a" or viadenin or vialpha or viatate or vidoma or vitadone or vitadral or "vitale a" or vitalfa or vitama or "vitamin A" or "vitamin a1" or "vitaplex a" or "vitapur a" or "vitasan a" or "vitavel a" or vitpex or vogan or "vogan neu" or "wandervit a" or xerophthol).ti,ab,hw,kw. |          |
| 52 (nutraceutical* or nutriceutrical*).ti,ab,hw,kw.                                                                                                                                                                                                                                                                                                                                                                                                                                                                                                                                                                                               | 11285    |
| 53 or/15-52                                                                                                                                                                                                                                                                                                                                                                                                                                                                                                                                                                                                                                       | 4389329  |
| 54 3 and 11 and 53                                                                                                                                                                                                                                                                                                                                                                                                                                                                                                                                                                                                                                | 692      |
| 55 14 or 54                                                                                                                                                                                                                                                                                                                                                                                                                                                                                                                                                                                                                                       | 742      |
| 56 exp evidence based medicine/                                                                                                                                                                                                                                                                                                                                                                                                                                                                                                                                                                                                                   | 1051311  |
| 57 exp meta analysis/                                                                                                                                                                                                                                                                                                                                                                                                                                                                                                                                                                                                                             | 213519   |
| 58 exp Meta-Analysis as Topic/                                                                                                                                                                                                                                                                                                                                                                                                                                                                                                                                                                                                                    | 52129    |
| 59 exp "systematic review"/                                                                                                                                                                                                                                                                                                                                                                                                                                                                                                                                                                                                                       | 143674   |
| 60 exp Guideline/ or exp Practice Guideline/                                                                                                                                                                                                                                                                                                                                                                                                                                                                                                                                                                                                      | 447201   |
| 61 exp controlled study/                                                                                                                                                                                                                                                                                                                                                                                                                                                                                                                                                                                                                          | 5801155  |
| 62 exp Randomized Controlled Trial/                                                                                                                                                                                                                                                                                                                                                                                                                                                                                                                                                                                                               | 914761   |
| 63 exp triple blind procedure/                                                                                                                                                                                                                                                                                                                                                                                                                                                                                                                                                                                                                    | 165      |
| 64 exp Double-Blind Method/                                                                                                                                                                                                                                                                                                                                                                                                                                                                                                                                                                                                                       | 279970   |
| 65 exp Single-Blind Method/                                                                                                                                                                                                                                                                                                                                                                                                                                                                                                                                                                                                                       | 53366    |
| 66 exp latin square design/                                                                                                                                                                                                                                                                                                                                                                                                                                                                                                                                                                                                                       | 338      |
| 67 exp Placebos/                                                                                                                                                                                                                                                                                                                                                                                                                                                                                                                                                                                                                                  | 300265   |
| 68 exp Placebo Effect/                                                                                                                                                                                                                                                                                                                                                                                                                                                                                                                                                                                                                            | 8680     |
| 69 exp comparative study/                                                                                                                                                                                                                                                                                                                                                                                                                                                                                                                                                                                                                         | 2773952  |
| 70 exp intervention studies/                                                                                                                                                                                                                                                                                                                                                                                                                                                                                                                                                                                                                      | 33415    |
| 71 exp Cross-Sectional Studies/                                                                                                                                                                                                                                                                                                                                                                                                                                                                                                                                                                                                                   | 475290   |
| 72 exp Cross-Over Studies/                                                                                                                                                                                                                                                                                                                                                                                                                                                                                                                                                                                                                        | 95075    |
| 73 exp Cohort Studies/                                                                                                                                                                                                                                                                                                                                                                                                                                                                                                                                                                                                                            | 2018636  |
| 74 exp longitudinal study/                                                                                                                                                                                                                                                                                                                                                                                                                                                                                                                                                                                                                        | 212953   |
| 75 exp retrospective study/                                                                                                                                                                                                                                                                                                                                                                                                                                                                                                                                                                                                                       | 1208635  |
| 76 exp prospective study/                                                                                                                                                                                                                                                                                                                                                                                                                                                                                                                                                                                                                         | 850587   |
| 77 exp clinical trial/                                                                                                                                                                                                                                                                                                                                                                                                                                                                                                                                                                                                                            | 1989504  |
| 78 clinical study/                                                                                                                                                                                                                                                                                                                                                                                                                                                                                                                                                                                                                                | 105424   |
| 79 exp case-control studies/                                                                                                                                                                                                                                                                                                                                                                                                                                                                                                                                                                                                                      | 1022983  |
| 80 exp confidence interval/                                                                                                                                                                                                                                                                                                                                                                                                                                                                                                                                                                                                                       | 160919   |
| 81 exp multivariate analysis/                                                                                                                                                                                                                                                                                                                                                                                                                                                                                                                                                                                                                     | 447149   |
| 82 ((evidence adj based) or (meta adj analys*) or (systematic* adj3 review*) or guideline* or (control* adj3 study) or (control* adj3 trial) or (randomized adj3                                                                                                                                                                                                                                                                                                                                                                                                                                                                                  | 17639749 |

study) or (randomized adj3 trial) or (randomised adj3 study) or (randomised adj3 trial) or "pragmatic clinical trial" or (doubl\* adj blind\*) or (doubl\* adj mask\*) or (singl\* adj blind\*) or (singl\* adj mask\*) or (tripl\* adj blind\*) or (tripl\* adj mask\*) or (trebl\* adj blind\*) or (trebl\* adj mask\*) or "latin square" or placebo\* or nocebo\* or multivariate or "comparative study" or "comparative survey" or "comparative analysis" or (intervention\* adj2 study) or (intervention\* adj2 trial) or "cross-sectional study" or "cross-sectional analysis" or "cross-sectional survey" or "cross-sectional design" or "prevalence study" or "prevalence analysis" or "prevalence survey" or "disease frequency study" or "disease frequency analysis" or "disease frequency survey" or crossover or "cross-over" or cohort\* or "longitudinal study" or "longitudinal survey" or "longitudinal analysis" or "longitudinal evaluation" or longitudinal\* or ((retrospective or "ex post facto") adj3 (study or survey or analysis or design)) or retrospectiv\* or "prospective study" or "prospective survey" or "prospective analysis" or prospectiv\* or "concurrent study" or "concurrent survey" or "concurrent analysis" or "clinical study" or "clinical trial" or "case control study" or "case base study" or "case referent study" or "case referent study" or "case referent study" or "case compeer study" or "case comparison study" or "matched case control" or "multicenter study" or "multi-center study" or "odds ratio" or "confidence interval" or "change analysis" or ((study or trial or random\* or control\*) and compar\*).mp,pt.

83 or/56-82 18129763

84 55 and 83 359

85 limit 84 to english language 357

limit 85 to (editorial or erratum or letter or note or addresses or autobiography or bibliography or biography or blogs or comment or dictionary or directory or interactive tutorial or interview or lectures or legal cases or legislation or news or newspaper article or overall or patient education handout or periodical index or portraits or published erratum or video-audio media or webcasts) [Limit not valid in Embase,Ovid MEDLINE(R),Ovid MEDLINE(R) Daily Update,Ovid MEDLINE(R) In-Process,Ovid MEDLINE(R) Publisher; records were retained]

86 13

87 85 not 86 344

88 (exp animals/ or exp nonhuman/) not exp humans/ 8929802

((alpaca or alpacas or amphibian or amphibians or animal or animals or antelope or armadillo or armadillos or avian or baboon or baboons or beagle or beagles or bee or bees or bird or birds or bison or bovine or buffalo or buffaloes or buffalos or "c elegans" or "Caenorhabditis elegans" or camel or camels or canine or canines or carp or cats or cattle or chick or chicken or chickens or chicks or chimp or chimpanze or chimpanzees or chimps or cow or cows or "D melanogaster" or

89 "dairy calf" or "dairy calves" or deer or dog or dogs or donkey or donkeys or 7676431

drosophila or "Drosophila melanogaster" or duck or duckling or ducklings or ducks or equid or equids or equine or equines or ferret or ferrets or finch or finches or fish or flatworm or flatworms or fox or foxes or frog or frogs or "fruit flies" or "fruit fly" or "G mellonella" or "Galleria mellonella" or geese or gerbil or gerbils or goat or goats or goose or gorilla or gorillas or hamster or hamsters or hare or hares or heifer or heifers or horse or horses or insect or insects



or jellyfish or kangaroo or kangaroos or kitten or kittens or lagomorph or lagomorphs or lamb or lambs or llama or llamas or macaque or macaques or macaw or macaws or marmoset or marmosets or mice or minipig or minipigs or mink or minks or monkey or monkeys or mouse or mule or mules or nematode or nematodes or octopus or octopuses or orangutan or "orang-utan" or orangutans or "orang-utans" or oxen or parrot or parrots or pig or pigeon or pigeons or piglet or piglets or pigs or porcine or primate or primates or quail or rabbit or rabbits or rat or rats or reptile or reptiles or rodent or rodents or ruminant or ruminants or salmon or sheep or shrimp or slug or slugs or swine or tamarin or tamarins or toad or toads or trout or urchin or urchins or vole or voles or waxworm or waxworms or worm or worms or xenopus or "zebra fish" or zebrafish) not (human or humans or patient or patients)).ti,ab,hw,kw.

90 87 not (88 or 89) 338  
 91 remove duplicates from 90 299

### Question 10

Database(s): **Embase** 1988 to 2017 Week 33, Ovid MEDLINE(R) 1946 to Present and Epub Ahead of Print, In-Process & Other Non-Indexed Citations and Ovid MEDLINE(R) Daily

Search Strategy:

| # | Searches                                                                                                                                                                                                                                                                                                                                                                                                                                                                                                                                                                                                                                                                                                                    | Results |
|---|-----------------------------------------------------------------------------------------------------------------------------------------------------------------------------------------------------------------------------------------------------------------------------------------------------------------------------------------------------------------------------------------------------------------------------------------------------------------------------------------------------------------------------------------------------------------------------------------------------------------------------------------------------------------------------------------------------------------------------|---------|
| 1 | sickle cell anemia.mp. or exp Anemia, Sickle Cell/                                                                                                                                                                                                                                                                                                                                                                                                                                                                                                                                                                                                                                                                          | 48700   |
| 2 | ((((drepanocytic or "haemoglobin s" or "hemoglobin s" or "Hb SS" or hbs or sickle or "sickle cell" or sickling or ss) adj2 (anaemia* or anemia* or disease* or disorder*)) or drepanocytemia* or drepanocytoses or drepanocytosis or "haemoglobin SS" or "hemoglobin SS" or meniscocytoses or meniscocytosis).ti,ab,hw,kw.                                                                                                                                                                                                                                                                                                                                                                                                  | 51656   |
| 3 | 1 or 2                                                                                                                                                                                                                                                                                                                                                                                                                                                                                                                                                                                                                                                                                                                      | 54093   |
| 4 | exp pain/                                                                                                                                                                                                                                                                                                                                                                                                                                                                                                                                                                                                                                                                                                                   | 1375315 |
| 5 | exp Chronic Pain/ or exp Headache/ or exp Headache Disorders/ or exp Back Pain/ or exp Neuralgia/ or exp Nociceptive Pain/ or exp Osteonecrosis/ or exp Migraine Disorders/ or exp Osteomyelitis/ or exp exp Low Back Pain/ or exp Neck Pain/ or exp abdominal pain/ or exp knee pain/ or exp upper abdominal pain/ or exp lower abdominal pain/ or exp perineal pain/ or exp inguinal pain/ or exp face pain/ or exp pelvic pain/ or exp shoulder pain/ or exp flank pain/ or exp limb pain/ or exp noncardiac chest pain/ or exp spinal pain/ or exp epigastric pain/ or exp ankle pain/ or exp thorax pain/ or exp patellofemoral pain syndrome/ or exp leg pain/ or exp eye pain/ or exp skin pain/ or exp arm pain/ or | 902910  |

|    |                                                                                                                                                                                                                                                                                                                                                                                                                                                                                                                                                                                                                                                                                                                                                                                                                                                                                                                                                                              |        |
|----|------------------------------------------------------------------------------------------------------------------------------------------------------------------------------------------------------------------------------------------------------------------------------------------------------------------------------------------------------------------------------------------------------------------------------------------------------------------------------------------------------------------------------------------------------------------------------------------------------------------------------------------------------------------------------------------------------------------------------------------------------------------------------------------------------------------------------------------------------------------------------------------------------------------------------------------------------------------------------|--------|
|    | exp hip pain/ or exp biliary tract pain/ or exp stomach pain/ or exp hand pain/ or exp heel pain/ or exp bone pain/                                                                                                                                                                                                                                                                                                                                                                                                                                                                                                                                                                                                                                                                                                                                                                                                                                                          |        |
| 6  | Acute Pain/ or exp Headache/ or exp Headache Disorders/ or exp Back Pain/ or exp Neuralgia/ or exp Nociceptive Pain/ or exp Osteonecrosis/ or exp Migraine Disorders/ or exp Osteomyelitis/ or exp Low Back Pain/ or exp Neck Pain/ or exp abdominal pain/ or exp knee pain/ or exp upper abdominal pain/ or exp lower abdominal pain/ or exp perineal pain/ or exp inguinal pain/ or exp face pain/ or exp pelvic pain/ or exp shoulder pain/ or exp flank pain/ or exp limb pain/ or exp noncardiac chest pain/ or exp spinal pain/ or exp epigastric pain/ or exp ankle pain/ or exp thorax pain/ or exp patellofemoral pain syndrome/ or exp leg pain/ or exp eye pain/ or exp skin pain/ or exp arm pain/ or exp hip pain/ or exp biliary tract pain/ or exp stomach pain/ or exp hand pain/ or exp heel pain/ or exp bone pain/                                                                                                                                        | 954703 |
| 7  | ("Alice in Wonderland Syndrome*" or "atypical neuralgia*" or "atypical neuralgias" or "back ache*" or "back pain*" or backache* or backpain* or cephalalgia* or cephalea* or cephalgia* or cephalodynia* or "cerebral pain*" or "chronic intractable pain*" or "chronic pain*" or "cranial pain*" or cranialgia* or "discogenic pain*" or "diskogenic pain*" or dorsalgia* or "head ache*" or "head pain*" or headache or headache* or hemicrania* or "inflammatory pain*" or "ischemic pain*" or lumbago or migraine* or migrainous or "Morton Neuroma*" or "nerve pain*" or neuralgia* or neurodynia* or "neuropathic pain*" or "nociceptive pain*" or "noncrisis pain*" or "non-crisis pain*" or "paroxysmal nerve pain*" or "Piriformis Muscle Syndrome*" or Sciatica* or "somatic pain*" or "status hemicranicus" or "stump neuralgia*" or "sunct syndrome" or "tissue pain*" or "vertebrogenic pain syndrome*" or "Visceral Pain*" or "widespread pain*").ti,ab,hw,kw. | 644341 |
| 8  | ("avascular necros*" or "avascular bone necros*" or "bone necros*" or (necros* adj3 bone) or "avascular bone" or "hip necros*" or "avascular hip*" or " avascular osteonecros*" or osteonecros* or (kienbock* adj1 disease) or (kienboeck* adj1 disease) or " leg ulcer*" or ((leg or "varicose leg") adj3 (ulcer* or ulcus)) or "crural ulcer*" or "cruris ulcer*" or "leg chronic ulcer*" or "leg ulcus" or "ulcer cruris" or "ulcus acruis" or "ulcus cruris varicosum" or "bone infarct*" or ulcer* or "tissue infarct*").ti,ab,hw,kw.                                                                                                                                                                                                                                                                                                                                                                                                                                   | 540080 |
| 9  | ("sickle cell crisis" or "sickle-cell crisis" or "pain crisis" or (("vaso-occlusive" or "vaso occlusive" or vasooclusive) adj2 (crisis or ache or pain* or event*)) or ((hip or rib* or sternal or abdom* or hepatic* or liver or kidney* or renal* or papilla*) adj2 (necros* or infarct* or sequest* or pain* or crisis or ache)) or "acute synovitis" or AVN or dactylitis or (extremity adj2 (pain* or ache)) or (bone adj2 (pain* or ache))).ti,ab,hw,kw.                                                                                                                                                                                                                                                                                                                                                                                                                                                                                                               | 297921 |
| 10 | 4 and 9                                                                                                                                                                                                                                                                                                                                                                                                                                                                                                                                                                                                                                                                                                                                                                                                                                                                                                                                                                      | 188632 |

|    |                                                                                                                                                                                                                                                                                                                                                                                                                                                                                                                                                                |         |
|----|----------------------------------------------------------------------------------------------------------------------------------------------------------------------------------------------------------------------------------------------------------------------------------------------------------------------------------------------------------------------------------------------------------------------------------------------------------------------------------------------------------------------------------------------------------------|---------|
| 11 | 6 or 10                                                                                                                                                                                                                                                                                                                                                                                                                                                                                                                                                        | 965787  |
| 12 | 4 and (7 or 8)                                                                                                                                                                                                                                                                                                                                                                                                                                                                                                                                                 | 528892  |
| 13 | 5 or 12                                                                                                                                                                                                                                                                                                                                                                                                                                                                                                                                                        | 951960  |
| 14 | exp blood transfusion/                                                                                                                                                                                                                                                                                                                                                                                                                                                                                                                                         | 225905  |
| 15 | ((plasma or blood or "red cell*") adj3 (exchang* or infus* or replac*)) or hemotherap* or "hemo-therap*" or multitransfus* or "plasma exchang*" or polytransfus* or retransfus* or transfus*).ti,ab,hw,kw.                                                                                                                                                                                                                                                                                                                                                     | 374554  |
| 16 | 14 or 15                                                                                                                                                                                                                                                                                                                                                                                                                                                                                                                                                       | 378925  |
| 17 | 3 and 13 and 16                                                                                                                                                                                                                                                                                                                                                                                                                                                                                                                                                | 897     |
| 18 | exp emergency ward/ or exp pain clinic/ or exp outpatient department/                                                                                                                                                                                                                                                                                                                                                                                                                                                                                          | 215339  |
| 19 | ("emergency depart*" or "emergency room*" or "emergency unit*" or "pain clinic*" or "pain center*" or "day hospital*" or "observation unit*").ti,ab,hw,kw.                                                                                                                                                                                                                                                                                                                                                                                                     | 232844  |
| 20 | 18 or 19                                                                                                                                                                                                                                                                                                                                                                                                                                                                                                                                                       | 330381  |
| 21 | 3 and 11 and 20                                                                                                                                                                                                                                                                                                                                                                                                                                                                                                                                                | 518     |
| 22 | 17 or 21                                                                                                                                                                                                                                                                                                                                                                                                                                                                                                                                                       | 1357    |
| 23 | limit 22 to (editorial or erratum or letter or note or addresses or autobiography or bibliography or biography or blogs or comment or dictionary or directory or interactive tutorial or interview or lectures or legal cases or legislation or news or newspaper article or overall or patient education handout or periodical index or portraits or published erratum or video-audio media or webcasts) [Limit not valid in Embase,Ovid MEDLINE(R),Ovid MEDLINE(R) Daily Update,Ovid MEDLINE(R) In-Process,Ovid MEDLINE(R) Publisher; records were retained] | 70      |
| 24 | 22 not 23                                                                                                                                                                                                                                                                                                                                                                                                                                                                                                                                                      | 1287    |
| 25 | limit 24 to (english language and yr="2010 -Current")                                                                                                                                                                                                                                                                                                                                                                                                                                                                                                          | 813     |
| 26 | (exp animals/ or exp nonhuman/) not exp humans/                                                                                                                                                                                                                                                                                                                                                                                                                                                                                                                | 9053148 |
| 27 | ((alpaca or alpacas or amphibian or amphibians or animal or animals or antelope or armadillo or armadillos or avian or baboon or baboons or beagle or beagles or bee or bees or bird or birds or bison                                                                                                                                                                                                                                                                                                                                                         | 7780357 |

|    |                                                                                                                                                                                                                                                                                                                                                                                                                                                                                                                                                                                                                                                                                                                                                                                                                                                                                                                                                                                                                                                                                                                                                                                                                                                                                                                                                                                                                                                                                                                                                                                                                                                                                                                                                                                                                                                      |     |
|----|------------------------------------------------------------------------------------------------------------------------------------------------------------------------------------------------------------------------------------------------------------------------------------------------------------------------------------------------------------------------------------------------------------------------------------------------------------------------------------------------------------------------------------------------------------------------------------------------------------------------------------------------------------------------------------------------------------------------------------------------------------------------------------------------------------------------------------------------------------------------------------------------------------------------------------------------------------------------------------------------------------------------------------------------------------------------------------------------------------------------------------------------------------------------------------------------------------------------------------------------------------------------------------------------------------------------------------------------------------------------------------------------------------------------------------------------------------------------------------------------------------------------------------------------------------------------------------------------------------------------------------------------------------------------------------------------------------------------------------------------------------------------------------------------------------------------------------------------------|-----|
|    | <p>or bovine or buffalo or buffaloes or buffalos or "c elegans" or "Caenorhabditis elegans" or camel or camels or canine or canines or carp or cats or cattle or chick or chicken or chickens or chicks or chimp or chimpanze or chimpanzees or chimps or cow or cows or "D melanogaster" or "dairy calf" or "dairy calves" or deer or dog or dogs or donkey or donkeys or drosophila or "Drosophila melanogaster" or duck or duckling or ducklings or ducks or equid or equids or equine or equines or feline or felines or ferret or ferrets or finch or finches or fish or flatworm or flatworms or fox or foxes or frog or frogs or "fruit flies" or "fruit fly" or "G mellonella" or "Galleria mellonella" or geese or gerbil or gerbils or goat or goats or goose or gorilla or gorillas or hamster or hamsters or hare or hares or heifer or heifers or horse or horses or insect or insects or jellyfish or kangaroo or kangaroos or kitten or kittens or lagomorph or lagomorphs or lamb or lambs or llama or llamas or macaque or macaques or macaw or macaws or marmoset or marmosets or mice or minipig or minipigs or mink or minks or monkey or monkeys or mouse or mule or mules or nematode or nematodes or octopus or octopuses or orangutan or "orang-utan" or orangutans or "orang-utans" or oxen or parrot or parrots or pig or pigeon or pigeons or piglet or piglets or pigs or porcine or primate or primates or quail or rabbit or rabbits or rat or rats or reptile or reptiles or rodent or rodents or ruminant or ruminants or salmon or sheep or shrimp or slug or slugs or swine or tamarin or tamarins or toad or toads or trout or urchin or urchins or vole or voles or waxworm or waxworms or worm or worms or xenopus or "zebra fish" or zebrafish) not (human or humans or patient or patients)).ti,ab,hw,kw.</p> |     |
| 28 | 25 not (26 or 27)                                                                                                                                                                                                                                                                                                                                                                                                                                                                                                                                                                                                                                                                                                                                                                                                                                                                                                                                                                                                                                                                                                                                                                                                                                                                                                                                                                                                                                                                                                                                                                                                                                                                                                                                                                                                                                    | 811 |
| 29 | remove duplicates from 28                                                                                                                                                                                                                                                                                                                                                                                                                                                                                                                                                                                                                                                                                                                                                                                                                                                                                                                                                                                                                                                                                                                                                                                                                                                                                                                                                                                                                                                                                                                                                                                                                                                                                                                                                                                                                            | 749 |

For questions (1,2,3,5,7,8,10), studies published before 2010 were identified through a previously published search strategy described in Yawn et al. JAMA 2014;312(10):1033-48.
